# Supplementary material for: Development and validation of the Medical Home Care Coordination Survey for assessing care coordination in the primary care setting from the patient and provider perspectives
Source: Springer Nature journal article supplement (doi:10.1186/s12913-015-0893-1), 2015-06-06
Supplement: MOESM2 [file 9757362]

### SURVEY INSTRUCTIONS

- ❖ Do your best to answer each question based on your opinion of the care you received from your primary care provider's office in the **last 12 months**.
- ❖ Please **only** select **one answer per question**.
- ❖ Please answer all questions by checking the box to the left of your answer.
- ❖ Please answer all questions honestly and completely.
- ❖ Sometimes you will be told to **skip** over some questions in the survey based on your answer. If this happens, the arrow beside your answer will tell you what question to answer next.

For example, if you answered "No" below, your next question to answer will be Question 20. You can skip all questions between your current question and Question 20.

- Yes  
 No → If No, Go to QUESTION 20

Please read this to better understand the survey questions:

**COORDINATING YOUR CARE** means making sure everyone (including you, your primary care provider, people who take care of you, and other doctors you see) have all the information needed to take care of your health.

**A PRIMARY CARE PROVIDER** is a doctor or other health care provider, such as an advanced practice nurse (APRN) or a physician assistant (PA), who you go to for all or most of your routine health care needs.

**A PRIMARY CARE TEAM** is a group of people in your primary care provider's office who work together to take care of you. This includes your primary care provider, the medical assistant and nurses. Sometimes it may include other health care providers like diabetes educators, nutritionists and pharmacists.

**PLEASE BEGIN THE SURVEY**

1. Our records show that you visited your primary care provider’s office in the last 12 months. Is this true?

- Yes
No -> If No, PLEASE STOP HERE and return the survey in the enclosed prepaid envelope.

2. Do you have a care plan?

(A care plan is something that you and your primary care provider make together on what needs to be done to take care of your health.)

- Yes
No -> If No, Go to QUESTION 6

3. My primary care team...

a. ...asks for my ideas when we make a plan for my care.

- Never
Rarely
Sometimes
Usually
Always
I Don't Know

b. ...follows through with the care plan it creates with me.

- Never
Rarely
Sometimes
Usually
Always
I Don't Know

4. My primary care team helps me plan so I can take care of my health even when things change or when unexpected things happen.

- Disagree
Somewhat Disagree
Neither Agree nor Disagree
Somewhat Agree
Agree
I Don't Know

5. Someone on my primary care team helps me set goals for taking care of my health.

- Never
Rarely
Sometimes
Usually
Always

I Don't Know

6. Someone on my primary care team...

a. ...asks me about what I need for support, like care programs, financial services, equipment and transportation.

- Disagree
Somewhat Disagree
Neither Agree nor Disagree
Somewhat Agree
Agree

I Don't Know

b. ...gives me information about services offered at their office or in my community, like counseling programs, support groups and rehabilitation programs.

- Disagree
Somewhat Disagree
Neither Agree nor Disagree
Somewhat Agree
Agree

I Don't Know

c. ...encourages me to attend programs in my community that could help me, like support groups and exercise classes.

- Disagree
Somewhat Disagree
Neither Agree nor Disagree
Somewhat Agree
Agree

I Don't Know

7. In the last 12 months, have you done any lab tests, like blood tests and x-rays?

- Yes
No -> If No, Go to QUESTION 10

8. I get the results of my lab tests in a timely manner.

- Never
Rarely
Sometimes
Usually
Always

I Don't Know

**Medical Home Care Coordination Survey – Patient (MHCCS-P)**

9. Someone on my primary care team...

a. ...tells me all my test results, good and bad.

- Never
- Rarely
- Sometimes
- Usually
- Always
- I Don't Know

b. ...helps me understand what my lab tests, x-rays or other test results mean.

- Never
- Rarely
- Sometimes
- Usually
- Always
- I Don't Know

**10. How long ago were you hospitalized, if at all?**

*(Hospitalized means you were admitted to a hospital for treatment for a condition. This does not include Emergency Room visits.)*

- Less than 1 month ago
- Between 1 and 6 months ago
- Between 6 and 12 months ago
- I was not hospitalized in the last 12 months → Go to **QUESTION 12**

**11. After I leave the hospital, my primary care team...**

a. ...knows about the care I received from the hospital.

- Disagree
- Somewhat Disagree
- Neither Agree nor Disagree
- Somewhat Agree
- Agree
- I Don't Know

b. ...helps me get back on my feet after I leave the hospital.

- Disagree
- Somewhat Disagree
- Neither Agree nor Disagree
- Somewhat Agree
- Agree
- I Don't Know

c. ...knows about new prescriptions or if there was a change in my medication.

- Disagree
- Somewhat Disagree
- Neither Agree nor Disagree
- Somewhat Agree
- Agree
- I Don't Know

**12. In general, the care I receive is well coordinated.**

- Disagree
- Somewhat Disagree
- Neither Agree nor Disagree
- Somewhat Agree
- Agree
- I Don't Know

**13. In general, how would you rate your overall health?**

- Poor
- Fair
- Good
- Very Good
- Excellent

**14. In general, how would you rate the care you receive at your primary care provider's office?**

- Poor
- Fair
- Good
- Very Good
- Excellent

**15. What is the highest level of education you have received?**

- No schooling
- Grade 1 through 12, What Grade: \_\_\_\_\_
- High School or GED Completed
- Some College Completed
- Associate's Degree Completed
- Bachelor's Degree Completed
- Advanced Degree Completed
- Other, Please Specify: \_\_\_\_\_
